# Supplementary material
Source: Springer Nature journal article supplement (https://www.springermedizin.de/resource/supplementary/12967_2007_216_MOESM6_ESM.pdf/9575964)

a)

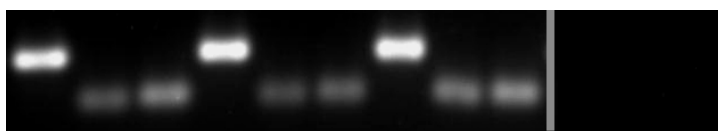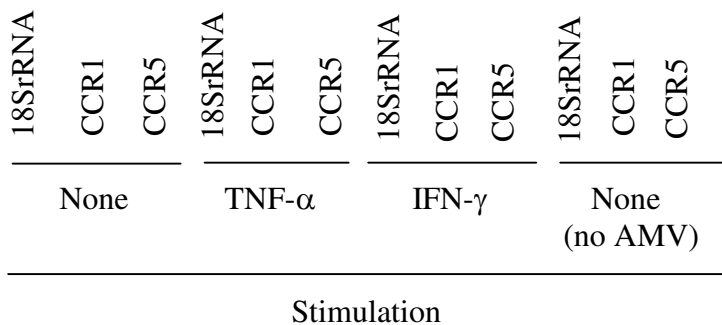

b)

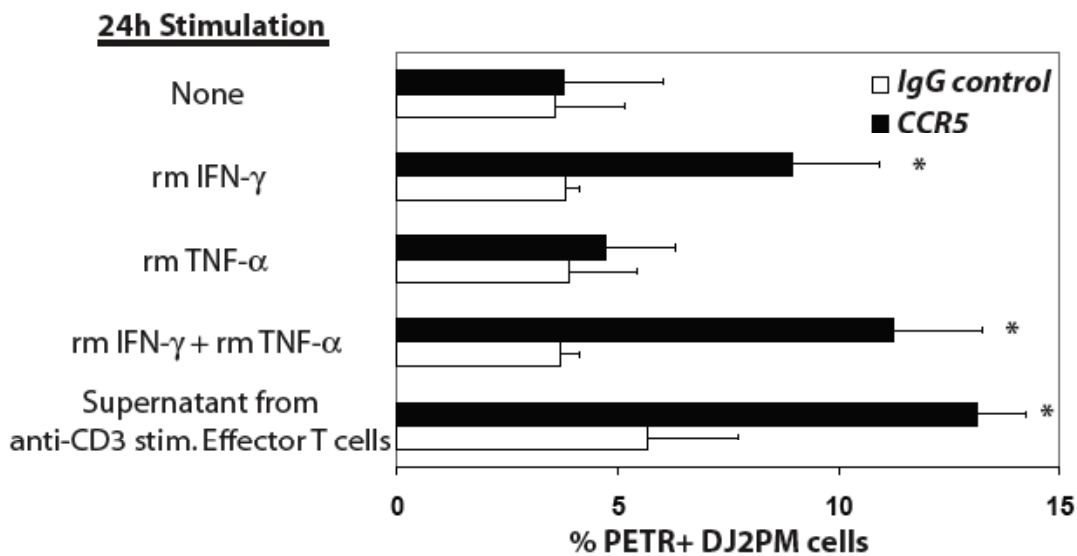

Supplement: MOESM6 [file 9575964]
